# Supplementary material
Source: Springer Nature journal article supplement (https://www.springermedizin.de/resource/supplementary/12911_2013_730_MOESM1_ESM.pdf/9526230)
Supplement: MOESM1 [file 9526230]

**Metro South Health Service District**  
**Indigenous Health Check: Age 0-4**  
 Community Health

|             |  |
|-------------|--|
| UR Number   |  |
| Surname     |  |
| Other Names |  |
| DOB         |  |
| Sex         |  |

An \* indicates a mandatory field.

**A. PATIENT DETAILS**

|                                                             |                                                    |
|-------------------------------------------------------------|----------------------------------------------------|
| Age: *                                                      | <input type="text"/>                               |
| Is there consent by parent/carer to perform health check? * | <input type="radio"/> Yes <input type="radio"/> No |

|                                                        |                                                                                             |                                              |                                                                                             |
|--------------------------------------------------------|---------------------------------------------------------------------------------------------|----------------------------------------------|---------------------------------------------------------------------------------------------|
| Consent for health assessment to be used in research * | <input type="radio"/> Yes <input type="radio"/> No                                          |                                              |                                                                                             |
| Had a previous 715 (0-4) at this practice?             | <input type="radio"/> Yes <input type="radio"/> No <input checked="" type="radio"/> Missing | Is there any new medical and family history? | <input type="radio"/> Yes <input type="radio"/> No <input checked="" type="radio"/> Missing |
| Mother's Name:                                         | <input type="text"/>                                                                        | Mother's Age: <input type="text"/>           | Mother's URN:* <input type="text"/><br><input type="radio"/> Not in ERIC                    |
| Father's Name:                                         | <input type="text"/>                                                                        | Father's Age: <input type="text"/>           | Father's URN:* <input type="text"/><br><input type="radio"/> Not in ERIC                    |

**OR**

|                                           |                      |
|-------------------------------------------|----------------------|
| Carer's Name (and relationship to child): | <input type="text"/> |
|-------------------------------------------|----------------------|

|              |                      |              |                      |
|--------------|----------------------|--------------|----------------------|
| Sibling Name | <input type="text"/> | Sibling Age: | <input type="text"/> |
|--------------|----------------------|--------------|----------------------|

**Add Siblings**

|                                            |                                                                                                                          |
|--------------------------------------------|--------------------------------------------------------------------------------------------------------------------------|
| Single Parent:                             | <input type="radio"/> Yes <input type="radio"/> No <input checked="" type="radio"/> Missing                              |
| Mother Employed:                           | <input type="radio"/> Yes <input type="radio"/> No <input type="radio"/> Unsure <input checked="" type="radio"/> Missing |
| Father Employed:                           | <input type="radio"/> Yes <input type="radio"/> No <input type="radio"/> Unsure <input checked="" type="radio"/> Missing |
| Other people involved in the child's care: | <input type="text"/>                                                                                                     |

**Indigenous Status**

|           |                                                                                                                                                                               |
|-----------|-------------------------------------------------------------------------------------------------------------------------------------------------------------------------------|
| Child: *  | <input type="radio"/> Aboriginal <input type="radio"/> Torres Strait <input type="radio"/> Both <input checked="" type="radio"/> Missing                                      |
| Mother: * | <input type="radio"/> Aboriginal <input type="radio"/> Torres Strait <input type="radio"/> Both <input type="radio"/> Non-Indigenous <input checked="" type="radio"/> Missing |
| Father: * | <input type="radio"/> Aboriginal <input type="radio"/> Torres Strait <input type="radio"/> Both <input type="radio"/> Non-Indigenous <input checked="" type="radio"/> Missing |

**B. PREVIOUS HEALTH CHECKS**

|                      |                      |
|----------------------|----------------------|
| <input type="text"/> | <input type="text"/> |
|----------------------|----------------------|

|                                                                      |                                                                                                                          |
|----------------------------------------------------------------------|--------------------------------------------------------------------------------------------------------------------------|
| Has the patient had a previous Medicare item 715 (0-4) Health Check? | <input type="radio"/> Yes <input type="radio"/> No <input type="radio"/> Unsure <input checked="" type="radio"/> Missing |
| If < 2 months, has the patient received a newborn check?             | <input type="radio"/> Yes <input type="radio"/> No <input type="radio"/> Unsure <input checked="" type="radio"/> Missing |
| Has the patient had a paediatric review in the last 12 months        | <input type="radio"/> Yes <input type="radio"/> No <input type="radio"/> Unsure <input checked="" type="radio"/> Missing |

### C. IMMUNISATION STATUS

|                                                  |                                                                                                                          |
|--------------------------------------------------|--------------------------------------------------------------------------------------------------------------------------|
| Is the patient's immunisation status up to date? | <input type="radio"/> Yes <input type="radio"/> No <input type="radio"/> Unsure <input checked="" type="radio"/> Missing |
| Comments:                                        |                                                                                                                          |

### D. MEDICAL HISTORY

|                                                                 |                                                                                                                                     |
|-----------------------------------------------------------------|-------------------------------------------------------------------------------------------------------------------------------------|
| What was the mode of delivery?                                  | <input type="radio"/> Vaginal <input type="radio"/> Caesarean <input type="radio"/> Unsure <input checked="" type="radio"/> Missing |
| At what gestation (weeks) was the first antenatal visit?        | k <input type="text"/>                                                                                                              |
| What was the gestation (weeks) at birth?                        | k <input type="text"/>                                                                                                              |
| What was the birth weight (grams)?                              | <input type="text"/> g                                                                                                              |
| Where there any complications during or shortly after delivery? | <input type="radio"/> Yes <input type="radio"/> No <input checked="" type="radio"/> Missing                                         |
| If yes please specify:                                          |                                                                                                                                     |
| Were there any other antenatal/ postnatal issues of concern?    | <input type="radio"/> Yes <input type="radio"/> No <input checked="" type="radio"/> Missing                                         |
| If yes please specify:                                          |                                                                                                                                     |
| Did the child receive neonatal screening for hearing?           | <input type="radio"/> Yes <input type="radio"/> No <input type="radio"/> Unsure <input checked="" type="radio"/> Missing            |
| What was the outcome?                                           | <input type="radio"/> Pass <input type="radio"/> Fail <input checked="" type="radio"/> Missing                                      |
| Regular Snoring                                                 | <input type="radio"/> Yes <input type="radio"/> No <input type="radio"/> Unsure <input checked="" type="radio"/> Missing            |
| Number of URIs in the past year?                                | <input type="text"/>                                                                                                                |
| Any constipation in the past year?                              | <input type="radio"/> Yes <input type="radio"/> No <input checked="" type="radio"/> Missing                                         |
| <b>Past Medical History</b>                                     |                                                                                                                                     |
| Growth faltering/Failure to Thrive:                             | <input type="radio"/> Yes <input type="radio"/> No <input type="radio"/> Unsure <input checked="" type="radio"/> Missing            |
|                                                                 |                                                                                                                                     |

|                                                                  |                                                                                                                          |
|------------------------------------------------------------------|--------------------------------------------------------------------------------------------------------------------------|
| Recurrent chest infection:                                       | <input type="radio"/> Yes <input type="radio"/> No <input type="radio"/> Unsure <input checked="" type="radio"/> Missing |
| Pneumonia:                                                       | <input type="radio"/> Yes <input type="radio"/> No <input type="radio"/> Unsure <input checked="" type="radio"/> Missing |
| Rheumatic Heart Disease:                                         | <input type="radio"/> Yes <input type="radio"/> No <input type="radio"/> Unsure <input checked="" type="radio"/> Missing |
| Asthma:                                                          | <input type="radio"/> Yes <input type="radio"/> No <input type="radio"/> Unsure <input checked="" type="radio"/> Missing |
| Ear infections:                                                  | <input type="radio"/> Yes <input type="radio"/> No <input type="radio"/> Unsure <input checked="" type="radio"/> Missing |
| Skin infections:                                                 | <input type="radio"/> Yes <input type="radio"/> No <input type="radio"/> Unsure <input checked="" type="radio"/> Missing |
| Other:                                                           | <input type="radio"/> Yes <input type="radio"/> No <input type="radio"/> Unsure <input checked="" type="radio"/> Missing |
| If Other, please specify - hospitalisations, injuries, burns:    | <input type="text"/>                                                                                                     |
| <b>Relevant Family Medical History (Mother or Father):</b>       |                                                                                                                          |
| Hypertension:                                                    | <input type="radio"/> Yes <input type="radio"/> No <input type="radio"/> Unsure <input checked="" type="radio"/> Missing |
| Gestational Diabetes:                                            | <input type="radio"/> Yes <input type="radio"/> No <input type="radio"/> Unsure <input checked="" type="radio"/> Missing |
| CVD:                                                             | <input type="radio"/> Yes <input type="radio"/> No <input type="radio"/> Unsure <input checked="" type="radio"/> Missing |
| Mental illness (e.g. depression, anxiety, schizophrenia):        | <input type="radio"/> Yes <input type="radio"/> No <input type="radio"/> Unsure <input checked="" type="radio"/> Missing |
| Asthma/Atopy/Eczema:                                             | <input type="radio"/> Yes <input type="radio"/> No <input type="radio"/> Unsure <input checked="" type="radio"/> Missing |
| Other:                                                           | <input type="radio"/> Yes <input type="radio"/> No <input type="radio"/> Unsure <input checked="" type="radio"/> Missing |
| Please specify - if yes to any of the above:                     | <input type="text"/>                                                                                                     |
| <b>CHILD</b>                                                     |                                                                                                                          |
| <b>Current Medications (prescriptions and over the counter):</b> | <input type="text"/>                                                                                                     |
| <b>Allergies/drug intolerances:</b>                              | <input type="text"/>                                                                                                     |

### E. SOCIAL HISTORY/CARER CONCERNS

|                                                                     |               |                                                                                             |
|---------------------------------------------------------------------|---------------|---------------------------------------------------------------------------------------------|
| Who does the child live with?<br>(e.g parent, grandparent, friend?) | Parent        | <input type="radio"/> Yes <input type="radio"/> No <input checked="" type="radio"/> Missing |
|                                                                     | Siblings      | <input type="radio"/> Yes <input type="radio"/> No <input checked="" type="radio"/> Missing |
|                                                                     | Grandparent   | <input type="radio"/> Yes <input type="radio"/> No <input checked="" type="radio"/> Missing |
|                                                                     | Foster Parent | <input type="radio"/> Yes <input type="radio"/> No <input checked="" type="radio"/> Missing |

|                                                                                   |                                                                                             |                                                                                             |
|-----------------------------------------------------------------------------------|---------------------------------------------------------------------------------------------|---------------------------------------------------------------------------------------------|
|                                                                                   | Friend                                                                                      | <input type="radio"/> Yes <input type="radio"/> No <input checked="" type="radio"/> Missing |
|                                                                                   | Other                                                                                       | <input type="radio"/> Yes <input type="radio"/> No <input checked="" type="radio"/> Missing |
| If Other, please specify:                                                         | <input type="text"/>                                                                        |                                                                                             |
| Who is the primary carer of the child?                                            | <input type="text"/>                                                                        |                                                                                             |
| How many people usually live at the house?                                        | <input type="text"/>                                                                        |                                                                                             |
| Does the carer have any concerns about the child's development?                   | <input type="radio"/> Yes <input type="radio"/> No <input checked="" type="radio"/> Missing |                                                                                             |
| Any concerns about hearing/listening/talking?                                     | <input type="radio"/> Yes <input type="radio"/> No <input checked="" type="radio"/> Missing |                                                                                             |
| Any concerns about vision?                                                        | <input type="radio"/> Yes <input type="radio"/> No <input checked="" type="radio"/> Missing |                                                                                             |
| If Yes to any of the above, please specify:                                       | <input type="text"/>                                                                        |                                                                                             |
| <b>Stressful Life Events</b>                                                      |                                                                                             |                                                                                             |
| Have there been any stressful life events to cause you or your child to be upset? | <input type="radio"/> Yes <input type="radio"/> No <input checked="" type="radio"/> Missing |                                                                                             |
| Conflict at home?                                                                 | <input type="radio"/> Yes <input type="radio"/> No <input checked="" type="radio"/> Missing |                                                                                             |
| Family Deaths?                                                                    | <input type="radio"/> Yes <input type="radio"/> No <input checked="" type="radio"/> Missing |                                                                                             |
| Exposure to violence?                                                             | <input type="radio"/> Yes <input type="radio"/> No <input checked="" type="radio"/> Missing |                                                                                             |
| Illness to primary caregiver?                                                     | <input type="radio"/> Yes <input type="radio"/> No <input checked="" type="radio"/> Missing |                                                                                             |
| Abuse?                                                                            | <input type="radio"/> Yes <input type="radio"/> No <input checked="" type="radio"/> Missing |                                                                                             |
| Comments:                                                                         | <input type="text"/>                                                                        |                                                                                             |
| Are there any concerns about the mother/carer's current well-being?               | <input type="radio"/> Yes <input type="radio"/> No <input checked="" type="radio"/> Missing |                                                                                             |
| If Yes, please specify (e.g. support network, stressors, mood, general health)    | <input type="text"/>                                                                        |                                                                                             |
| <b>Domestic Violence/Abuse</b>                                                    |                                                                                             |                                                                                             |
| Are you ever afraid of your partner?                                              | <input type="radio"/> Yes <input type="radio"/> No <input checked="" type="radio"/> Missing |                                                                                             |

|                                                                                      |                                                                                             |
|--------------------------------------------------------------------------------------|---------------------------------------------------------------------------------------------|
| In the last year, has your partner kicked, punched or otherwise hurt you?            | <input type="radio"/> Yes <input type="radio"/> No <input checked="" type="radio"/> Missing |
| In the last year, has your partner threatened to hurt you?                           | <input type="radio"/> Yes <input type="radio"/> No <input checked="" type="radio"/> Missing |
| Do you feel threatened or afraid of anyone in the community?                         | <input type="radio"/> Yes <input type="radio"/> No <input checked="" type="radio"/> Missing |
| Would you like help with any of this now?                                            | <input type="radio"/> Yes <input type="radio"/> No <input checked="" type="radio"/> Missing |
| Has the parent experienced abuse as a child? (emotional, neglect, physical, sexual): | <input type="radio"/> Yes <input type="radio"/> No <input checked="" type="radio"/> Missing |
| If yes to any of the above please comment as appropriate:                            | <input type="text"/>                                                                        |

### F. LEARNING AND BEHAVIOUR

|                                                          |                                                                                             |
|----------------------------------------------------------|---------------------------------------------------------------------------------------------|
| Indicate whether the child attends any of the following: |                                                                                             |
| Playgroup:                                               | <input type="radio"/> Yes <input type="radio"/> No <input checked="" type="radio"/> Missing |
| Childcare centre:                                        | <input type="radio"/> Yes <input type="radio"/> No <input checked="" type="radio"/> Missing |
| Pre-Prep or Prep:                                        | <input type="radio"/> Yes <input type="radio"/> No <input checked="" type="radio"/> Missing |
| Other (please specify):                                  | <input type="text"/>                                                                        |
| Are any of the above indigenous organisations?           | <input type="radio"/> Yes <input type="radio"/> No <input checked="" type="radio"/> Missing |

### G. NUTRITION

|                                                                       |                                                                                             |
|-----------------------------------------------------------------------|---------------------------------------------------------------------------------------------|
| Was the child ever breastfed?                                         | <input type="radio"/> Yes <input type="radio"/> No <input checked="" type="radio"/> Missing |
| Is the child currently being breastfed?                               | <input type="radio"/> Yes <input type="radio"/> No <input checked="" type="radio"/> Missing |
| If no, what age was the breastfeeding stopped?                        | <input type="text"/> months                                                                 |
| Was the child ever bottle fed?                                        | <input type="radio"/> Yes <input type="radio"/> No <input checked="" type="radio"/> Missing |
| Is the child currently bottle fed?                                    | <input type="radio"/> Yes <input type="radio"/> No <input checked="" type="radio"/> Missing |
| If No, what age was the bottle feeding stopped?                       | <input type="text"/> months                                                                 |
| What age did the child start cow's milk or dairy food (e.g. custard)? | <input type="text"/> months                                                                 |
| What age did the child start solids?                                  | <input type="text"/> months                                                                 |
| What was their first solid food?                                      | <input type="text"/>                                                                        |
| What is the child's typical diet?                                     |                                                                                             |
| Breakfast:                                                            | <input type="text"/>                                                                        |
| Lunch:                                                                | <input type="text"/>                                                                        |
| Dinner:                                                               | <input type="text"/>                                                                        |

|                                                                        |                                                                                                                                                                                                                                                    |
|------------------------------------------------------------------------|----------------------------------------------------------------------------------------------------------------------------------------------------------------------------------------------------------------------------------------------------|
|                                                                        |                                                                                                                                                                                                                                                    |
| Snacks:                                                                |                                                                                                                                                                                                                                                    |
| What is the vegetable and fruit component of this diet?                | <input type="radio"/> None<br><input type="radio"/> Less than 5 serves of vegetables and 2 serves of fruit<br><input type="radio"/> Equal to or more than 5 serves of vegetables and 2 serves of fruit<br><input checked="" type="radio"/> Missing |
| Since this time yesterday has the baby/child had any of the following? |                                                                                                                                                                                                                                                    |
| Breast milk:                                                           | <input type="radio"/> Yes <input type="radio"/> No <input checked="" type="radio"/> Missing                                                                                                                                                        |
| Baby formula:                                                          | <input type="radio"/> Yes <input type="radio"/> No <input checked="" type="radio"/> Missing                                                                                                                                                        |
| Milk (tin/powder/fresh):                                               | <input type="radio"/> Yes <input type="radio"/> No <input checked="" type="radio"/> Missing                                                                                                                                                        |
| Flavoured milk:                                                        | <input type="radio"/> Yes <input type="radio"/> No <input checked="" type="radio"/> Missing                                                                                                                                                        |
| Tea:                                                                   | <input type="radio"/> Yes <input type="radio"/> No <input checked="" type="radio"/> Missing                                                                                                                                                        |
| Soft drink/cordial:                                                    | <input type="radio"/> Yes <input type="radio"/> No <input checked="" type="radio"/> Missing                                                                                                                                                        |
| Fruit juice:                                                           | <input type="radio"/> Yes <input type="radio"/> No <input checked="" type="radio"/> Missing                                                                                                                                                        |
| Water:                                                                 | <input type="radio"/> Yes <input type="radio"/> No <input checked="" type="radio"/> Missing                                                                                                                                                        |
| Take away food:                                                        | <input type="radio"/> Yes <input type="radio"/> No <input checked="" type="radio"/> Missing                                                                                                                                                        |
| Any concerns about feeding?                                            | <input type="radio"/> Yes <input type="radio"/> No <input checked="" type="radio"/> Missing                                                                                                                                                        |
| If Yes, please specify:                                                |                                                                                                                                                                                                                                                    |

### H. PARENTAL SUBSTANCE USE

|                                                                                            |                                                                                                                                                                                      |
|--------------------------------------------------------------------------------------------|--------------------------------------------------------------------------------------------------------------------------------------------------------------------------------------|
| <b>Smoking</b>                                                                             |                                                                                                                                                                                      |
| Does anyone living in the household currently smoke regularly?                             | <input type="radio"/> Yes <input type="radio"/> No <input checked="" type="radio"/> Missing                                                                                          |
| If Yes, does anyone smoke inside the house?                                                | <input type="radio"/> Yes <input type="radio"/> No <input checked="" type="radio"/> Missing                                                                                          |
| If Yes, please state the relationship to the child: Mother, Father, Other (please specify) | <input type="text"/>                                                                                                                                                                 |
| If Yes, do they want assistance to quit smoking?                                           | <input type="radio"/> Yes <input type="radio"/> No <input type="radio"/> Unsure <input checked="" type="radio"/> Missing                                                             |
| <b>Alcohol</b> *Based on current national alcohol guidelines                               |                                                                                                                                                                                      |
| Does the child's mother drink alcohol?                                                     | <input type="radio"/> Yes <input type="radio"/> No <input checked="" type="radio"/> Missing                                                                                          |
| If Yes, please state if harmful or non-harmful                                             | <input type="checkbox"/> > 2 std drinks/day avg; drinks 6-7 days/wk; > 14 std drinks/wk<br><input type="checkbox"/> <= 2 std drinks/day; 1-2 alcohol free days/wk; <14 std drinks/wk |

|                                                                                                                                                                                        |                                                                                                                                                                                                                                                                                                     |                                                                                                                                                                    |
|----------------------------------------------------------------------------------------------------------------------------------------------------------------------------------------|-----------------------------------------------------------------------------------------------------------------------------------------------------------------------------------------------------------------------------------------------------------------------------------------------------|--------------------------------------------------------------------------------------------------------------------------------------------------------------------|
| levels:                                                                                                                                                                                | <input type="checkbox"/> > 4 std drinks on any one day<br><input checked="" type="checkbox"/> Missing                                                                                                                                                                                               |                                                                                                                                                                    |
| Does the child's father drink alcohol?                                                                                                                                                 | <input type="radio"/> Yes <input type="radio"/> No <input checked="" type="radio"/> Missing                                                                                                                                                                                                         |                                                                                                                                                                    |
| If Yes, please state if harmful or non-harmful levels:                                                                                                                                 | <input type="checkbox"/> > 4 std drinks/day avg or drinks 6-7 days/wk or > 28 std drinks/wk<br><input type="checkbox"/> ≤ 4 std drinks/day, 1-2 alcohol free days/wk or < 28 std drinks/wk<br><input type="checkbox"/> > 6 std drinks on any one day<br><input checked="" type="checkbox"/> Missing |                                                                                                                                                                    |
| <b>Other Substances</b>                                                                                                                                                                |                                                                                                                                                                                                                                                                                                     |                                                                                                                                                                    |
| Does a parent/carer use other substances?                                                                                                                                              | <input type="radio"/> Yes <input type="radio"/> No <input checked="" type="radio"/> Missing                                                                                                                                                                                                         |                                                                                                                                                                    |
| Marijuana                                                                                                                                                                              | <input type="radio"/> Yes <input type="radio"/> No <input checked="" type="radio"/> Missing                                                                                                                                                                                                         | <input type="radio"/> Daily <input type="radio"/> Weekly <input type="radio"/> Monthly <input type="radio"/> Occasionally <input checked="" type="radio"/> Missing |
| Amphetamines/Ice                                                                                                                                                                       | <input type="radio"/> Yes <input type="radio"/> No <input checked="" type="radio"/> Missing                                                                                                                                                                                                         | <input type="radio"/> Daily <input type="radio"/> Weekly <input type="radio"/> Monthly <input type="radio"/> Occasionally <input checked="" type="radio"/> Missing |
| Heroin                                                                                                                                                                                 | <input type="radio"/> Yes <input type="radio"/> No <input checked="" type="radio"/> Missing                                                                                                                                                                                                         | <input type="radio"/> Daily <input type="radio"/> Weekly <input type="radio"/> Monthly <input type="radio"/> Occasionally <input checked="" type="radio"/> Missing |
| Cocaine                                                                                                                                                                                | <input type="radio"/> Yes <input type="radio"/> No <input checked="" type="radio"/> Missing                                                                                                                                                                                                         | <input type="radio"/> Daily <input type="radio"/> Weekly <input type="radio"/> Monthly <input type="radio"/> Occasionally <input checked="" type="radio"/> Missing |
| Inhaled solvents                                                                                                                                                                       | <input type="radio"/> Yes <input type="radio"/> No <input checked="" type="radio"/> Missing                                                                                                                                                                                                         | <input type="radio"/> Daily <input type="radio"/> Weekly <input type="radio"/> Monthly <input type="radio"/> Occasionally <input checked="" type="radio"/> Missing |
| Methadone                                                                                                                                                                              | <input type="radio"/> Yes <input type="radio"/> No <input checked="" type="radio"/> Missing                                                                                                                                                                                                         | <input type="radio"/> Daily <input type="radio"/> Weekly <input type="radio"/> Monthly <input type="radio"/> Occasionally <input checked="" type="radio"/> Missing |
| Did the mother use any of the following substances during her pregnancy of this child? <input type="radio"/> Yes <input type="radio"/> No <input checked="" type="radio"/> Missing     |                                                                                                                                                                                                                                                                                                     |                                                                                                                                                                    |
| <input type="checkbox"/> Smoking<br><input type="checkbox"/> Alcohol<br><input type="checkbox"/> Marijuana<br><input type="checkbox"/> Amphetamines<br><input type="checkbox"/> Heroin |                                                                                                                                                                                                                                                                                                     |                                                                                                                                                                    |

**PART 2: NURSE'S ASSESSMENT  
A. CHILDHOOD DEVELOPMENT**

|                                                            |                                                                                             |
|------------------------------------------------------------|---------------------------------------------------------------------------------------------|
| Were any problems with gross motor development identified: | <input type="radio"/> Yes <input type="radio"/> No <input checked="" type="radio"/> Missing |
| If yes, comment:                                           | <input type="text"/>                                                                        |
| Were any problems with fine motor development identified:  | <input type="radio"/> Yes <input type="radio"/> No <input checked="" type="radio"/> Missing |
| If yes, comment:                                           | <input type="text"/>                                                                        |

|                                                                                                                                                                                                                                                                                        |                                                                                             |
|----------------------------------------------------------------------------------------------------------------------------------------------------------------------------------------------------------------------------------------------------------------------------------------|---------------------------------------------------------------------------------------------|
| Were any problems with language development identified:                                                                                                                                                                                                                                | <input type="radio"/> Yes <input type="radio"/> No <input checked="" type="radio"/> Missing |
| If yes, comment:                                                                                                                                                                                                                                                                       | <input type="text"/>                                                                        |
| Were any problems with social development identified:                                                                                                                                                                                                                                  | <input type="radio"/> Yes <input type="radio"/> No <input checked="" type="radio"/> Missing |
| If yes, comment:                                                                                                                                                                                                                                                                       | <input type="text"/>                                                                        |
| <b>Assessment Outcome:</b>                                                                                                                                                                                                                                                             |                                                                                             |
| <input type="radio"/> Satisfactory<br><input type="radio"/> Recheck (child not able to be adequately assessed)<br><input type="radio"/> Known deficit<br><input type="radio"/> Review (concerns/mild delay)<br><input type="radio"/> Refer<br><input checked="" type="radio"/> Missing |                                                                                             |

### B. DYNAMICS

|                                                                                  |                                                                                             |
|----------------------------------------------------------------------------------|---------------------------------------------------------------------------------------------|
| Please comment on the interaction between parent/carer and child (if indicated): |                                                                                             |
| Problem identified:                                                              | <input type="radio"/> Yes <input type="radio"/> No <input checked="" type="radio"/> Missing |
| Behavioural intervention could be of use:                                        | <input type="radio"/> Yes <input type="radio"/> No <input checked="" type="radio"/> Missing |
| Comment:                                                                         | <input type="text"/>                                                                        |

### C. PHYSICAL ASSESSMENT

|                                                        |                                                                                                                                           |
|--------------------------------------------------------|-------------------------------------------------------------------------------------------------------------------------------------------|
| Weight:                                                | <input type="text"/> <b>kg</b>                                                                                                            |
| Height:                                                | <input type="text"/> <b>cm</b>                                                                                                            |
| Head circumference:                                    | <input type="text"/> <b>cm</b>                                                                                                            |
| <b>Oral Health</b>                                     |                                                                                                                                           |
| Are the child's teeth brushed twice daily?             | <input type="radio"/> Yes <input type="radio"/> No <input type="radio"/> N/A <input checked="" type="radio"/> Missing                     |
| If so, who brushes them?                               | <input type="radio"/> Child <input type="radio"/> Parent/Care giver <input type="radio"/> Unsure <input checked="" type="radio"/> Missing |
| If child brushes their own teeth, are they supervised? | <input type="radio"/> Yes <input type="radio"/> No <input checked="" type="radio"/> Missing                                               |
| Does the child have gum disease?                       | <input type="radio"/> Yes <input type="radio"/> No <input checked="" type="radio"/> Missing                                               |
| Does the child have dental caries?                     | <input type="radio"/> Yes <input type="radio"/> No <input checked="" type="radio"/> Missing                                               |
| If yes please specify which stage:                     | <input type="radio"/> Stage 1<br><input type="radio"/> Stage 2<br><input type="radio"/> Stage 3                                           |

|                                                 |                                                                           |
|-------------------------------------------------|---------------------------------------------------------------------------|
|                                                 | <input type="radio"/> Stage 4<br><input checked="" type="radio"/> Missing |
| Other dental problems (please specify):         |                                                                           |
| <b>Nurse's suggestion for doctor to review:</b> |                                                                           |

### PART 3: MEDICAL ASSESSMENT

#### A. GROWTH

|                                        |                                                                                             |
|----------------------------------------|---------------------------------------------------------------------------------------------|
| Is there evidence of growth faltering? | <input type="radio"/> Yes <input type="radio"/> No <input checked="" type="radio"/> Missing |
|----------------------------------------|---------------------------------------------------------------------------------------------|

#### B. PHYSICAL EXAMINATION

|                                                 |                                                                                                      |                          |
|-------------------------------------------------|------------------------------------------------------------------------------------------------------|--------------------------|
| <b>Newborn Examination (0-2 months)</b>         |                                                                                                      |                          |
| Was a full newborn examination performed today? | <input type="radio"/> Yes <input type="radio"/> No <input checked="" type="radio"/> Missing          |                          |
| If Yes:                                         | <input type="radio"/> Normal <input type="radio"/> Abnormal <input checked="" type="radio"/> Missing |                          |
| If Abnormal, please specify:                    |                                                                                                      |                          |
| <b>Eyes</b>                                     |                                                                                                      |                          |
| Red reflex present (< 8 weeks)                  | <input type="radio"/> Yes <input type="radio"/> No <input checked="" type="radio"/> Missing          |                          |
| Squint                                          | <input type="radio"/> Yes <input type="radio"/> No <input checked="" type="radio"/> Missing          |                          |
| If abnormal, please specify:                    |                                                                                                      |                          |
| <b>Ears (Tympanic membrane; TM)</b>             |                                                                                                      |                          |
|                                                 | <b>L</b>                                                                                             | <b>R</b>                 |
| TM Normal                                       | <input type="checkbox"/>                                                                             | <input type="checkbox"/> |
| TM obscured by wax                              | <input type="checkbox"/>                                                                             | <input type="checkbox"/> |
| TM dry perforation                              | <input type="checkbox"/>                                                                             | <input type="checkbox"/> |
| TM wet perforation                              | <input type="checkbox"/>                                                                             | <input type="checkbox"/> |
| Tympanic membrane bulging                       | <input type="checkbox"/>                                                                             | <input type="checkbox"/> |
| Other                                           | <input type="checkbox"/>                                                                             | <input type="checkbox"/> |
| Please specify:                                 |                                                                                                      |                          |
| <b>Skin</b>                                     |                                                                                                      |                          |
| Skin Problems?                                  | <input type="radio"/> Yes <input type="radio"/> No <input checked="" type="radio"/> Missing          |                          |
| Impetigo or boils                               | <input type="radio"/> Yes <input type="radio"/> No <input checked="" type="radio"/> Missing          |                          |

|                         |                                                                                             |
|-------------------------|---------------------------------------------------------------------------------------------|
| Sores (more than three) | <input type="radio"/> Yes <input type="radio"/> No <input checked="" type="radio"/> Missing |
| Scabies                 | <input type="radio"/> Yes <input type="radio"/> No <input checked="" type="radio"/> Missing |
| Ringworm                | <input type="radio"/> Yes <input type="radio"/> No <input checked="" type="radio"/> Missing |
| Other                   | <input type="radio"/> Yes <input type="radio"/> No <input checked="" type="radio"/> Missing |
| Please specify:         |                                                                                             |

**Heart**

|                              |                                                                                                      |
|------------------------------|------------------------------------------------------------------------------------------------------|
| Cardiac Auscultation         | <input type="radio"/> Normal <input type="radio"/> Abnormal <input checked="" type="radio"/> Missing |
| If abnormal, please specify: |                                                                                                      |

**Respiratory**

|                                          |                                                                                                      |
|------------------------------------------|------------------------------------------------------------------------------------------------------|
| Throat examination                       | <input type="radio"/> Normal <input type="radio"/> Abnormal <input checked="" type="radio"/> Missing |
| If abnormality detected, please specify: |                                                                                                      |
| Chest examination                        | <input type="radio"/> Normal <input type="radio"/> Abnormal <input checked="" type="radio"/> Missing |
| Respiratory illness detected             | <input type="radio"/> Yes <input type="radio"/> No <input checked="" type="radio"/> Missing          |
| If abnormality detected, please specify: |                                                                                                      |

**Abdomen** (if indicated)

|                                          |                                                                                                      |
|------------------------------------------|------------------------------------------------------------------------------------------------------|
| Abdominal examination                    | <input type="radio"/> Normal <input type="radio"/> Abnormal <input checked="" type="radio"/> Missing |
| If abnormality detected, please specify: |                                                                                                      |

**Other examinations conducted:**

|  |  |
|--|--|
|  |  |
|--|--|

|                                                  |                                                                                     |                                                                                                                                                                                     |
|--------------------------------------------------|-------------------------------------------------------------------------------------|-------------------------------------------------------------------------------------------------------------------------------------------------------------------------------------|
| How has the child's mood been in the past month? | Happy:                                                                              | <input type="radio"/> No <input type="radio"/> A little <input type="radio"/> A lot <input type="radio"/> Unsure <input type="radio"/> N/A <input checked="" type="radio"/> Missing |
|                                                  | So sad nothing could make you happy:                                                | <input type="radio"/> No <input type="radio"/> A little <input type="radio"/> A lot <input type="radio"/> Unsure <input type="radio"/> N/A <input checked="" type="radio"/> Missing |
|                                                  | So worried or scared you felt sick in the belly:                                    | <input type="radio"/> No <input type="radio"/> A little <input type="radio"/> A lot <input type="radio"/> Unsure <input type="radio"/> N/A <input checked="" type="radio"/> Missing |
|                                                  | So angry or wild you couldn't walk away and cool down:                              | <input type="radio"/> No <input type="radio"/> A little <input type="radio"/> A lot <input type="radio"/> Unsure <input type="radio"/> N/A <input checked="" type="radio"/> Missing |
| Known Health Problems:                           | <input type="checkbox"/> Asthma<br><input type="checkbox"/> Rheumatic Heart Disease |                                                                                                                                                                                     |

**PROBLEM LIST**

|  |
|--|
|  |
|--|

|  |  |  |
|--|--|--|
|  |  |  |
|--|--|--|

### C. DIAGNOSIS

|                                                |                                                                                             |
|------------------------------------------------|---------------------------------------------------------------------------------------------|
| Was a new diagnosis made?                      | <input type="radio"/> Yes <input type="radio"/> No <input checked="" type="radio"/> Missing |
| If Yes, specify details:                       | <input type="text"/>                                                                        |
| <b>Significant health problems and issues:</b> | <input type="text"/>                                                                        |

### PART 4: ACTIONS

|                                                      |                                                                                             |
|------------------------------------------------------|---------------------------------------------------------------------------------------------|
| Was a referral made?                                 | <input type="radio"/> Yes <input type="radio"/> No <input checked="" type="radio"/> Missing |
| If Yes, for which services?                          | <input type="text"/>                                                                        |
| Was advice given?                                    | <input type="radio"/> Yes <input type="radio"/> No <input checked="" type="radio"/> Missing |
| If Yes, outline?                                     | <input type="text"/>                                                                        |
| Was medication recommended?                          | <input type="radio"/> Yes <input type="radio"/> No <input checked="" type="radio"/> Missing |
| If Yes, which one(s)?                                | <input type="text"/>                                                                        |
| Were vaccinations provided during this health check? | <input type="radio"/> Yes <input type="radio"/> No <input checked="" type="radio"/> Missing |
| If Yes, specify details:                             | <input type="text"/>                                                                        |
| Other intervention?                                  | <input type="radio"/> Yes <input type="radio"/> No <input checked="" type="radio"/> Missing |
| If Yes:                                              | <input type="text"/>                                                                        |
| Date of health check:                                | <input type="text" value="20/09/2010"/>                                                     |

### Sign Off

**Completed?** (Select this only when Health Check is complete)

**User Name**

**Password**

**Save**

Health Check Completed by:

Signed:

Date:
